# Supplementary material for: Identification of comutation in signaling pathways to predict the clinical outcomes of immunotherapy
Source: Springer Nature journal article supplement (doi:10.1186/s12967-022-03836-3), 2022-12-23
Supplement: MOESM1 [file 23855406]

## **Additional file 1**

# **Identification of comutation in signaling pathways to predict the clinical outcomes of immunotherapy**

### **Contents:**

**Figure S1-S7**

**Table S1-S6**

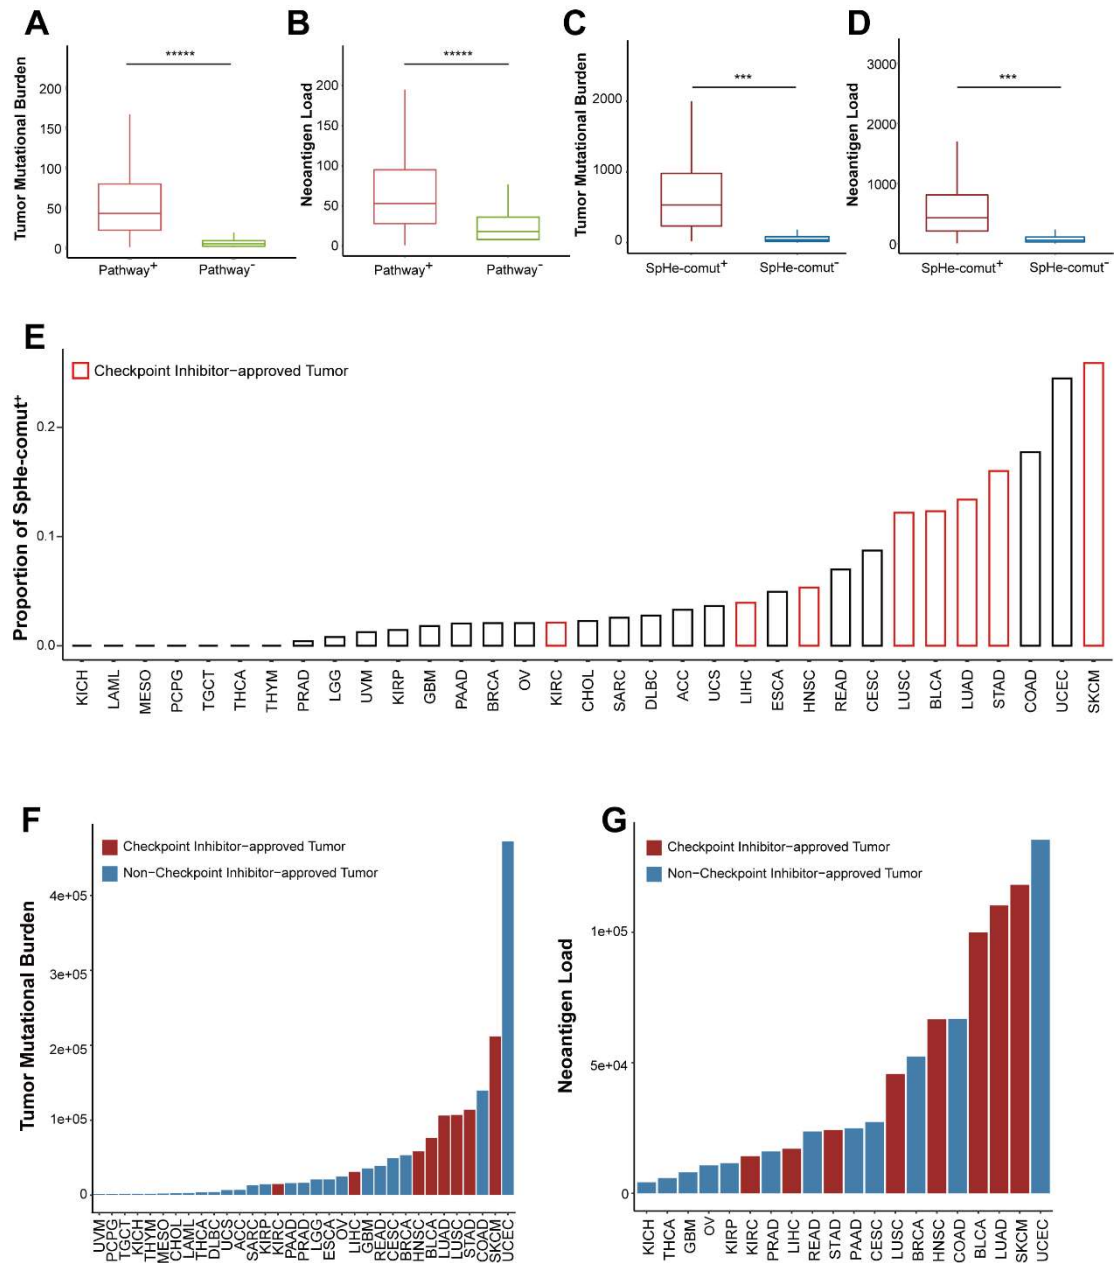

**Figure S1. Correlations between co-mutations of signaling pathways and tumor mutational burden, neoantigen load.**

(A) Comparison of tumor mutational burden between mutated and wild-type signaling pathways subgroups. (B) Comparison of neoantigen load between mutated and wild-type signaling pathways subgroups. (C) Comparison of tumor mutational burden between SpHe-comut<sup>+</sup> and SpHe-comut<sup>-</sup> subgroups. (D) Comparison of neoantigen load between SpHe-comut<sup>+</sup> and SpHe-comut<sup>-</sup> subgroups. (E) Frequency of SpHe-comut<sup>+</sup> in different TCGA cancer types. (F) Frequency of tumor mutational burden in different TCGA cancer types. (G) Frequency of neoantigen load in different TCGA cancer types. \*, p < 0.05; \*\*, p < 0.01; \*\*\*, p < 0.001; \*\*\*\*, p < 0.0001; \*\*\*\*\*, p < 0.00001.

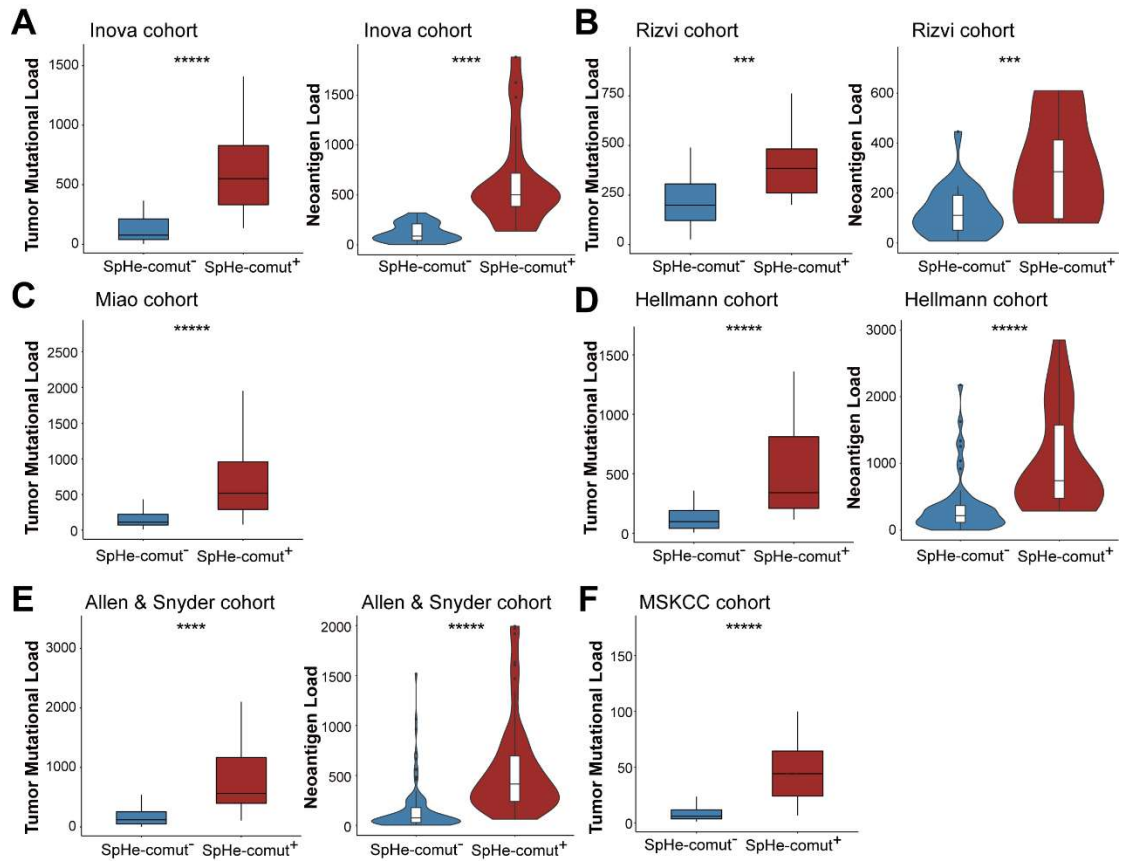

**Figure S2. Correlations between SpHe-comut status and Tumor mutational burden or neoantigen load.**

(A)-(F) Comparisons of tumor mutational burden and neoantigen load in SpHe-comut<sup>+</sup> and SpHe-comut<sup>-</sup> subgroups from the Inova cohort (A), the Rizvi cohort (B), the Miao cohort (C), the Hellmann cohort (D), the Allen & Snyder cohort (E), and the MSKCC cohort (F). \*\*\*,  $p < 0.001$ ; \*\*\*\*,  $p < 0.0001$ ; \*\*\*\*\*,  $p < 0.00001$ .

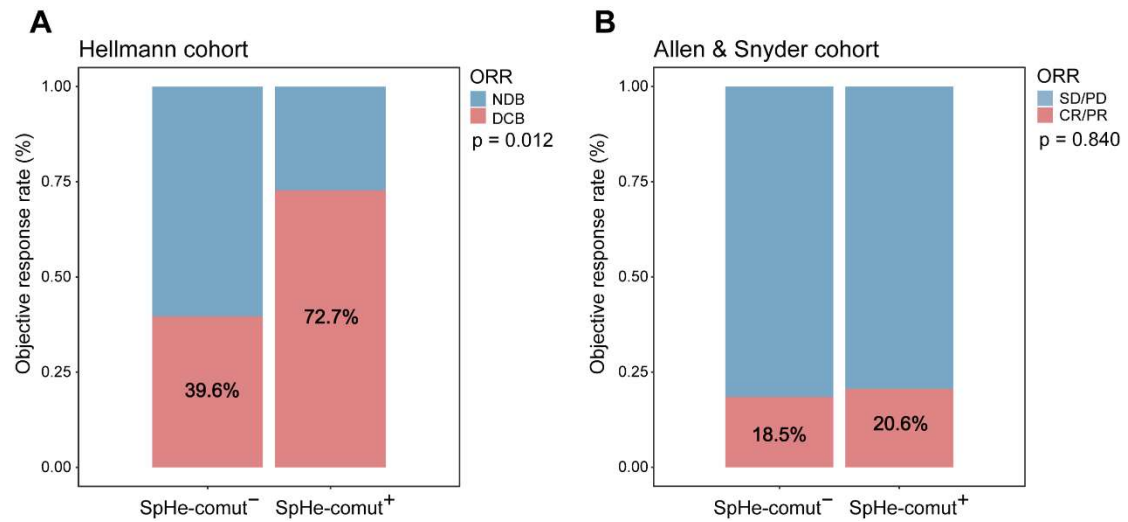

**Figure S3. Comparison of the objective response rate between the SpHe-comut<sup>+</sup> and SpHe-comut<sup>-</sup> groups.**

(A) Comparison of proportion of patients with DCB between the SpHe-comut<sup>+</sup> and SpHe-comut<sup>-</sup> subgroups from the Hellmann cohort. (B) Comparison of the objective response rate between the SpHe-comut<sup>+</sup> and SpHe-comut<sup>-</sup> groups in the Allen & Snyder cohort.

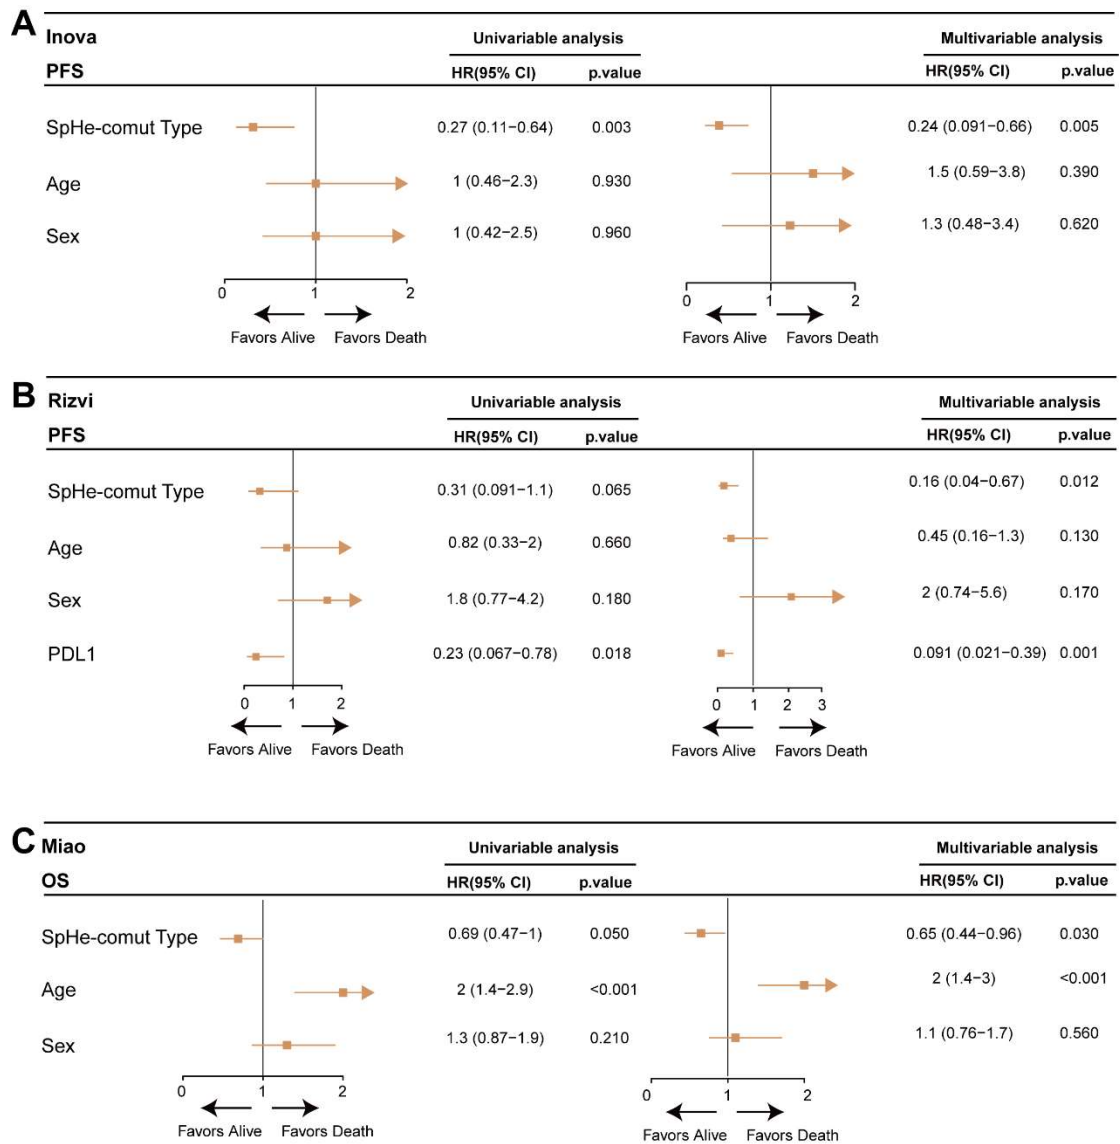

**Figure S4. Univariable and multivariable Cox analysis of SpHe-comut status and clinicopathological factors (Age, Sex, and PD-L1 expression) for PFS or OS in the ICBs cohorts.**

(A) Univariable and multivariable Cox analyses of SpHe-comut status and clinicopathological factors (Age, Sex) for PFS in the Inova cohort. (B) Univariable and multivariable Cox analyses of SpHe-comut status and clinicopathological factors (Age, Sex, PD-L1 expression) for PFS in the Rizvi cohort. (C) Univariable and multivariable Cox analyses of SpHe-comut status and clinicopathological factors (Age, Sex) for OS in the Miao cohort.

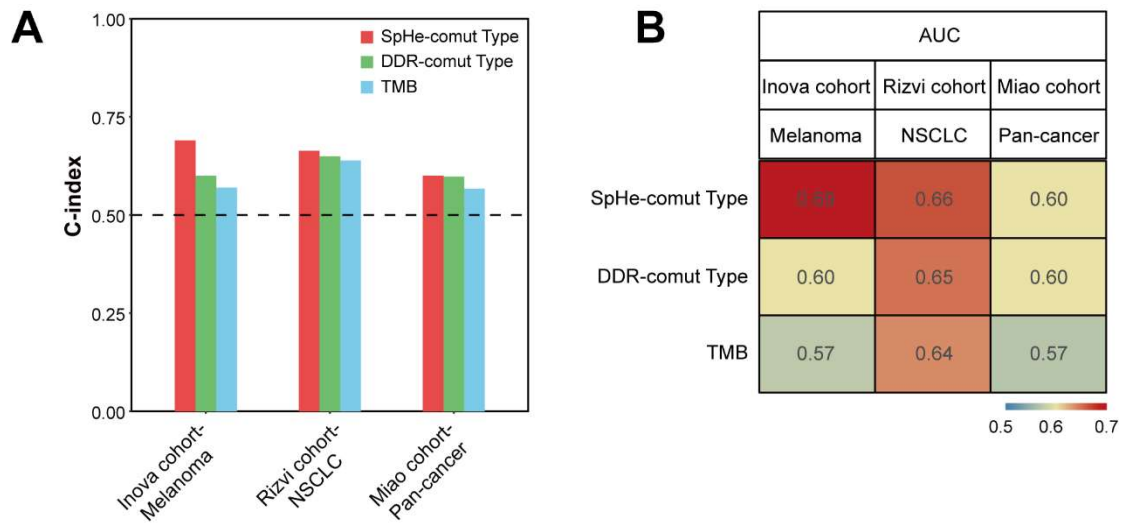

**Figure S5. Comparison of performance for predicting ORR among SpHe-comut, DDR-comut and TMB as a predictive biomarker.**

**(A)** Comparison of C-index for predicting ORR among SpHe-comut, DDR-comut and TMB in the Inova cohort (Melanoma), the Rizvi cohort (NSCLC), and the Miao cohort (Pan-cancer). **(B)** Comparison of AUC for predicting ORR among SpHe-comut, DDR-comut and TMB in the Inova cohort (Melanoma), the Rizvi cohort (NSCLC) and the Miao cohort (Pan-cancer).

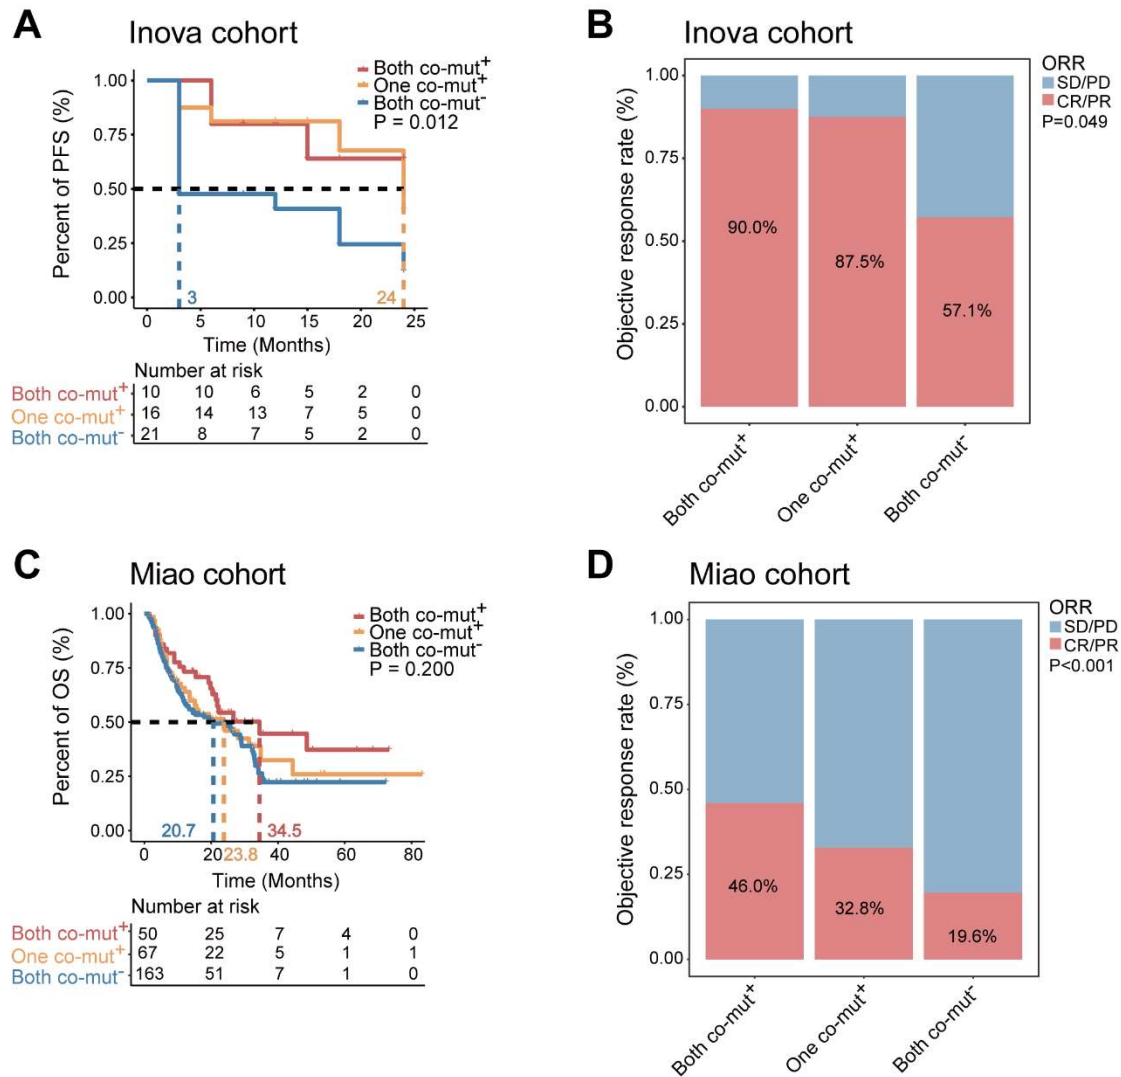

**Figure S6. Combining SpHe-comut status with DDR-comut status for the prediction of ICB therapy.**

(A) Kaplan-Meier estimates of PFS classified by the three indicated subgroups classified by SpHe-comut status and DDR-comut status in the Inova cohort. (B) Proportional representation of objective response rate among subgroups categorized by the three indicated subgroups classified by SpHe-comut status and DDR-comut status in the Inova cohort. (C) Kaplan-Meier estimates of OS classified by the three indicated subgroups classified by SpHe-comut status and DDR-comut status in the Miao cohort. (D) Proportional representation of objective response rate among subgroups categorized by the three indicated subgroups classified by SpHe-comut status and DDR-comut status in the Miao cohort.

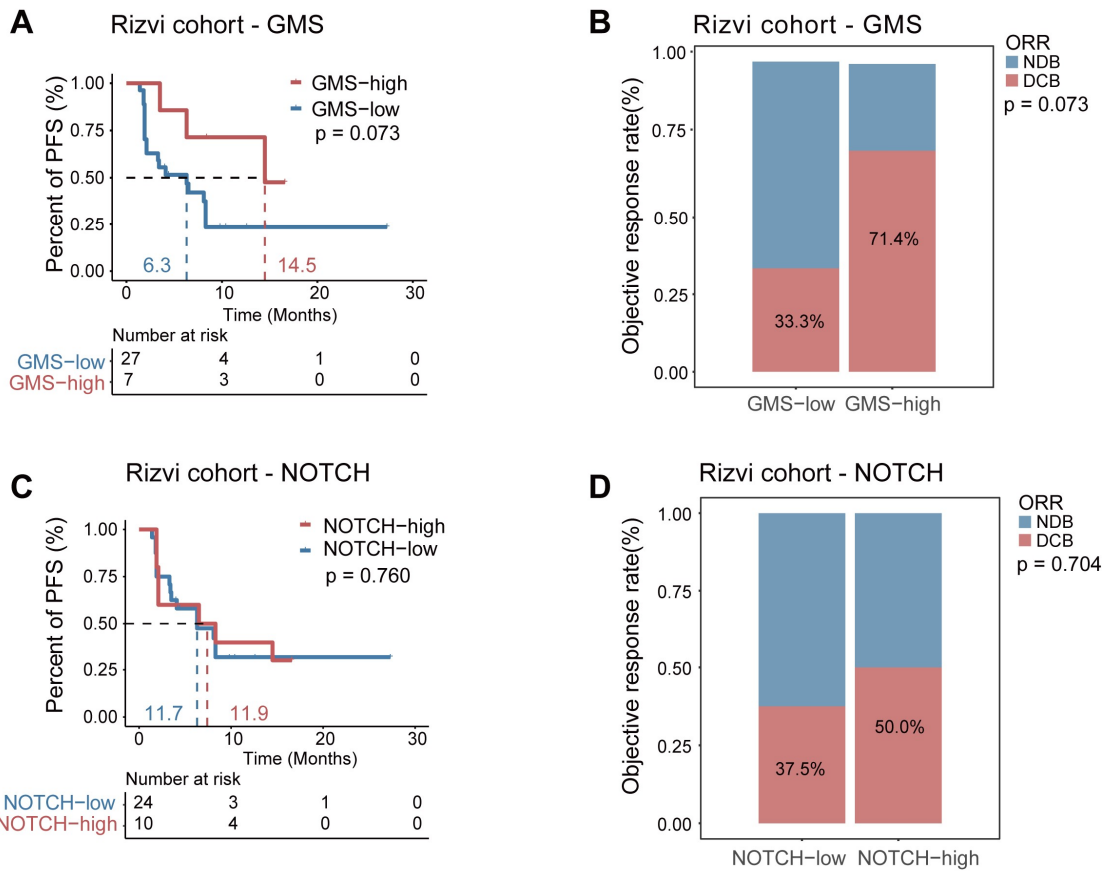

**Figure S7. Comparison of SpHe-comut status with NOTCH and GMS for the prediction of ICB therapy in the Rizvi cohort.**

**A)** Kaplan-Meier survival curves of PFS comparing the GMS-high and GMS-low groups. **(B)** Comparison of ORR between the GMS-high and GMS-low groups. **(C)** Kaplan-Meier survival curves of PFS comparing the NOTCH-high and NOTCH-low groups. **(D)** Comparison of ORR between the NOTCH-high and NOTCH-low groups.



**Table S1. Data source.**

| <b>Data source</b> | <b>Tumor</b>                                                       | <b>N</b> | <b>WES</b> | <b>RNAseq</b> | <b>Neoantigen</b> | <b>Clinical outcome</b> |
|--------------------|--------------------------------------------------------------------|----------|------------|---------------|-------------------|-------------------------|
| TCGA               | 33 cohorts                                                         | 9763     | 9763       | 9272          | 5446              | OS                      |
| Rizvi cohort       | Non-small cell lung cancer with anti-PD-1 therapy                  | 34       | 34         | —             | 34                | DCB<br>PFS              |
| Hellmann cohort    | Non-small cell lung cancer with anti-PD-1 plus anti-CTLA-4 therapy | 75       | 75         | —             | 75                | DCB<br>PFS              |
| Inova cohort       | Melanoma with anti-PD-(L)1/ plus anti-CTLA-4 therapy               | 50       | 50         | —             | 50                | ORR<br>PFS              |
| Allen cohort       | Melanoma with anti-CTLA-4 therapy                                  | 110      | 110        | —             | 110               | ORR<br>OS               |
| Snyder cohort      | Melanoma with anti-CTLA-4 therapy                                  | 64       | 64         | —             | 64                | ORR<br>OS               |
| Miao cohort        | Pan-cancer with anti-PD-1/ anti-PD-L1/ anti-CTLA-4 therapy         | 284      | 284        | —             | —                 | ORR<br>OS               |
| MSKCC cohort       | Pan-cancer with anti-PD-1/ anti-PD-L1/ anti-CTLA-4 therapy         | 1661     | 1661       | —             | —                 | OS                      |

TCGA, The Cancer Genome Atlas; WES, whole-exome sequencing; ORR, objective response rate; DCB, durable clinical benefit; PFS, progression-free survival; OS, Overall survival.

**Table S2. The Information for time period and dose selection of involved cohorts.**

**(Full forms see the Additional file 2: Table S2.xlsx)**

**Table S3. Gene list of immune-related gene signature.**

| <b>Classification</b>                  | <b>Genes</b>                                                                                                                      |
|----------------------------------------|-----------------------------------------------------------------------------------------------------------------------------------|
| Immune checkpoint                      | PD-1, PD-L1, PD-L2, LAG3, CTLA4, TIM3, VTCN1                                                                                      |
| T-effector and INF $\gamma$ pathway    | GBP1, IFI16, IFI30, IFNG, IRF1, STAT1, TAP1, TAP2, FAS, PSMB9, IL15RA, GZMA, GZMB, EOMES, CXCL10, CXCL9, CXCL11, TBX21, PRF1      |
| T cell receptor                        | CD27, GRAP2, LCK, PTPRCAP, CCL5, IL2RB, IKZF3, CD3G, CD74, CD3D, CD8A, CD4, TIGIT                                                 |
| Tumor microenvironment                 | IDO1, PTGS2, IL1B, IL18, IL6, IL12A, TNF, CD73                                                                                    |
| Cytolytic activity (CYT)               | GZMA, PRF1                                                                                                                        |
| Major Histocompatibility complex (MHC) | HLA-A, HLA-B, HLA-C, TAP1, TAP2, NLRC5, PSMB9, PSMB8, B2M                                                                         |
| Gene expression profile (GEP)          | CCL5, CD27, CD274, CD276, CD8A, CMKLR1, CXCL9, CXCR6, HLA-DQA1, HLA-DRB1, HLA-E, IDO1, LAG3, NKG7, PDCD1LG2, PSMB10, STAT1, TIGIT |

**Table S4. The significant survival-associated signaling pathways identified by the multivariate Cox regression model adjusted by clinical factors.**

| <b>Pathway</b>                   | <b>No. of Genes</b> | <b>HR (95% CI for HR)</b> | <b>P value</b> | <b>FDR</b> |
|----------------------------------|---------------------|---------------------------|----------------|------------|
| Spliceosome pathway              | 127                 | 0.82 (0.75 - 0.9)         | 4.2e-05        | 0.001      |
| Hedgehog signaling pathway       | 56                  | 0.85 (0.77 - 0.94)        | 1.5e-03        | 0.029      |
| ECM receptor interaction pathway | 84                  | 0.88 (0.81-0.95)          | 1.7e-03        | 0.029      |
| RNA degradation pathway          | 59                  | 0.83 (0.73 - 0.94)        | 3.9e-03        | 0.044      |
| Peroxisome pathway               | 78                  | 0.73 (0.64 - 0.83)        | 1.1e-06        | < 0.001    |
| Cytosolic DNA sensing pathway    | 55                  | 0.78 (0.66 - 0.92)        | 2.8e-03        | 0.038      |

**Table S5. Comparison of tumor mutational burden between SpHe-comut<sup>+</sup> and SpHe-comut<sup>-</sup> groups across different cancer types.**

| Tumor | SpHe-comut <sup>-</sup> |      |      | SpHe-comut <sup>+</sup> |        |        | Pvalue |
|-------|-------------------------|------|------|-------------------------|--------|--------|--------|
|       | N                       | mean | SD   | N                       | mean   | SD     |        |
| ACC   | 88                      | 1.08 | 1.62 | 3                       | 28.22  | 17.2   | 0.004  |
| BLCA  | 356                     | 3.88 | 3.39 | 50                      | 12.48  | 12.69  | <0.001 |
| BRCA  | 941                     | 1.16 | 1.58 | 20                      | 15.34  | 25.89  | <0.001 |
| CESC  | 251                     | 2.73 | 3.30 | 24                      | 25.11  | 54.83  | <0.001 |
| CHOL  | 43                      | 1.00 | 1.67 | 1                       | 15.76  | -      | 0.098  |
| COAD  | 311                     | 3.07 | 4.44 | 67                      | 40.46  | 36.79  | <0.001 |
| DLBC  | 35                      | 2.78 | 1.85 | 1                       | 1.87   | -      | 0.630  |
| ESCA  | 173                     | 2.57 | 1.32 | 9                       | 11.11  | 15.25  | 0.002  |
| GBM   | 373                     | 1.16 | 0.60 | 7                       | 70.95  | 115.04 | 0.001  |
| HNSC  | 479                     | 2.56 | 2.18 | 27                      | 11.50  | 14.76  | <0.001 |
| KICH  | 65                      | 0.61 | 1.85 | -                       | -      | -      | -      |
| KIRC  | 325                     | 1.15 | 0.88 | 7                       | 1.60   | 0.65   | 0.048  |
| KIRP  | 272                     | 1.37 | 0.66 | 4                       | 1.61   | 0.75   | 0.524  |
| LAML  | 114                     | 0.62 | 2.03 | -                       | -      | -      | -      |
| LGG   | 494                     | 0.59 | 0.31 | 4                       | 62.24  | 115.76 | 0.001  |
| LIHC  | 341                     | 2.09 | 1.47 | 14                      | 7.20   | 9.75   | 0.003  |
| LUAD  | 421                     | 4.28 | 4.11 | 65                      | 15.23  | 8.84   | <0.001 |
| LUSC  | 418                     | 5.35 | 3.85 | 58                      | 9.89   | 9.31   | <0.001 |
| MESO  | 78                      | 0.67 | 0.67 | -                       | -      | -      | -      |
| OV    | 423                     | 1.46 | 0.90 | 9                       | 3.79   | 5.78   | 0.041  |
| PAAD  | 145                     | 0.70 | 0.43 | 3                       | 105.61 | 180.18 | 0.006  |
| PCPG  | 175                     | 0.18 | 0.12 | -                       | -      | -      | -      |
| PRAD  | 473                     | 0.55 | 0.63 | 2                       | 83.75  | 94.62  | 0.015  |
| READ  | 120                     | 2.27 | 1.08 | 9                       | 83.12  | 101.62 | <0.001 |
| SARC  | 228                     | 1.05 | 1.30 | 6                       | 16.24  | 14.87  | <0.001 |
| SKCM  | 335                     | 6.52 | 6.48 | 117                     | 28.90  | 37.87  | <0.001 |
| STAD  | 336                     | 3.29 | 4.71 | 64                      | 29.57  | 27.01  | <0.001 |
| TGCT  | 127                     | 0.31 | 0.20 | -                       | -      | -      | -      |

|      |     |      |      |     |       |        |        |
|------|-----|------|------|-----|-------|--------|--------|
| THCA | 482 | 0.19 | 0.15 | -   | -     | -      | -      |
| THYM | 107 | 0.43 | 1.65 | -   | -     | -      | -      |
| UCEC | 395 | 3.44 | 5.20 | 128 | 86.39 | 107.45 | <0.001 |
| UCS  | 53  | 1.23 | 0.57 | 2   | 53.91 | 50.33  | 0.019  |
| UVM  | 79  | 0.26 | 0.10 | 1   | 8.11  | -      | 0.090  |

---

**Table S6. Comparison of neoantigen load between SpHe-comut<sup>+</sup> and SpHe-comut<sup>-</sup> groups across different cancer types.**

| Tumor | SpHe-comut <sup>-</sup> |        |        | SpHe-comut <sup>+</sup> |         |         | Pvalue |
|-------|-------------------------|--------|--------|-------------------------|---------|---------|--------|
|       | N                       | mean   | SD     | N                       | mean    | SD      |        |
| BLCA  | 340                     | 206.17 | 188.59 | 46                      | 643.80  | 530.74  | <0.001 |
| BRCA  | 832                     | 52.20  | 105.91 | 17                      | 526.35  | 816.06  | <0.001 |
| CESC  | 155                     | 111.52 | 188.61 | 15                      | 688.13  | 771.02  | <0.001 |
| COAD  | 167                     | 130.04 | 412.10 | 43                      | 1047.12 | 917.22  | <0.001 |
| GBM   | 144                     | 55.79  | 29.90  | -                       | -       | -       | -      |
| HNSC  | 454                     | 120.86 | 105.84 | 26                      | 451.65  | 712.96  | <0.001 |
| KICH  | 65                      | 64.74  | 124.31 | -                       | -       | -       | -      |
| KIRC  | 253                     | 54.81  | 30.97  | 5                       | 70.20   | 26.90   | 0.188  |
| KIRP  | 157                     | 73.34  | 45.38  | -                       | -       | -       | -      |
| LIHC  | 171                     | 90.09  | 64.33  | 9                       | 177.89  | 220.87  | 0.056  |
| LUAD  | 399                     | 186.66 | 173.68 | 59                      | 605.93  | 474.61  | <0.001 |
| LUSC  | 151                     | 238.61 | 195.39 | 21                      | 460.71  | 435.89  | 0.002  |
| OV    | 198                     | 52.38  | 33.58  | 5                       | 62.80   | 26.37   | 0.303  |
| PAAD  | 119                     | 80.26  | 64.94  | 3                       | 5095    | 8608.33 | 0.017  |
| PRAD  | 402                     | 36.98  | 45.44  | 1                       | 1152    | -       | 0.089  |
| READ  | 80                      | 68.15  | 41.59  | 6                       | 3031.33 | 3049.25 | 0.006  |
| SKCM  | 247                     | 231.29 | 252.77 | 84                      | 725.92  | 715.22  | <0.001 |
| STAD  | 73                      | 118.97 | 114.27 | 7                       | 2225.14 | 3564.30 | <0.001 |
| THCA  | 372                     | 15.75  | 15.55  | -                       | -       | -       | -      |
| UCEC  | 193                     | 107.45 | 158.81 | 49                      | 2339.94 | 3137.69 | <0.001 |
